# Supplementary material for: Relationship between the miRNA Profiles and Oncogene Mutations in Non-Smoker Lung Cancer. Relevance for Lung Cancer Personalized Screenings and Treatments
Source: PubMed Central journal article supplement (PMC7999775; doi:10.3390/jpm11030182), 2021-03-05
Supplement: jpm-11-00182-s001.pdf [file jpm-11-00182-s001.pdf]

Table S1. **Cancer Related miRNAs** altered (FC>= 2, p<=0.05) in Volcano Plot Analysis between average signal in samples with non-small cell lung cancer vs. small cell lung cancer.

| systematic_name | p-value     | Regulation | FC     |
|-----------------|-------------|------------|--------|
| hsa-miR-1238-5p | 0.011302715 | up         | 9.62   |
| hsa-miR-1296-5p | 0.007524842 | up         | 8.62   |
| hsa-miR-1306-3p | 0.021063296 | up         | 8.58   |
| hsa-miR-205-3p  | 4.19297E-06 | up         | 220.64 |
| hsa-miR-2277-3p | 0.00932873  | up         | 10.59  |
| hsa-miR-3149    | 0.000521124 | up         | 25.38  |
| hsa-miR-326     | 0.019960763 | down       | -8.85  |
| hsa-miR-4290    | 0.000451764 | up         | 16.39  |
| hsa-miR-4440    | 0.002965666 | up         | 10.05  |
| hsa-miR-4443    | 0.03872927  | up         | 2.41   |
| hsa-miR-4481    | 0.015899722 | up         | 7.33   |
| hsa-miR-4716-5p | 0.000232035 | up         | 20.00  |
| hsa-miR-4763-5p | 0.008582705 | up         | 8.26   |
| hsa-miR-4793-3p | 0.002927522 | up         | 16.70  |
| hsa-miR-483-3p  | 0.002941658 | up         | 13.22  |
| hsa-miR-504-3p  | 0.002079689 | up         | 14.95  |
| hsa-miR-595     | 0.000426941 | up         | 21.36  |
| hsa-miR-6730-3p | 0.016724579 | up         | 6.91   |
| hsa-miR-6743-3p | 0.043577574 | up         | 7.71   |
| hsa-miR-6779-3p | 0.016434822 | up         | 8.81   |
| hsa-miR-6794-3p | 0.005262722 | up         | 7.19   |
| hsa-miR-6817-5p | 0.044506542 | up         | 7.97   |
| hsa-miR-6826-5p | 0.02230857  | up         | 2.63   |
| hsa-miR-6886-3p | 0.014682693 | up         | 12.86  |
| hsa-miR-6891-3p | 0.01124693  | up         | 7.93   |
| hsa-miR-7108-3p | 0.012961295 | up         | 6.21   |

Table S2. **Cancer Related miRNAs** run on a Moderated T-Test Volcano Plot analysis (FC>= 2, p<=0.05) for each environmental exposure: (a) passive smoke at home (No vs. Yes), (b) passive smoke at work (No vs. Yes); (c) airborne car traffic pollution (low vs. high); (d) volcano ashes (>60Km vs. <=60Km); (e) radon risk (according to house type low vs. high).

| systematic_name | p-value  | Regulation ([low] Vs [high]) | FC ([low] Vs [high]) | environmental exposure  |
|-----------------|----------|------------------------------|----------------------|-------------------------|
| hsa-miR-2277-3p | 0.01829  | down                         | -7.38783             | passive_smoking_at_home |
| hsa-miR-328-3p  | 0.013113 | down                         | -5.98362             | passive_smoking_at_home |
| hsa-miR-4254    | 0.002496 | down                         | -14.3598             | passive_smoking_at_home |
| hsa-miR-483-3p  | 0.015154 | down                         | -7.43976             | passive_smoking_at_home |
| hsa-miR-491-3p  | 0.003077 | down                         | -11.924              | passive_smoking_at_home |
| hsa-miR-6743-3p | 0.022234 | down                         | -9.42842             | passive_smoking_at_home |
| hsa-miR-6779-3p | 0.009505 | down                         | -9.89658             | passive_smoking_at_home |

|                  |            |      |          |                         |
|------------------|------------|------|----------|-------------------------|
| hsa-miR-6886-3p  | 0.008845   | down | -13.8967 | passive_smoking_at_home |
| hsa-miR-4695-3p  | 0.04655064 | down | -5.80325 | Passive_smoking_at_work |
| hsa-let-7a-5p    | 0.041112   | up   | 7.4232   | Vehicle_traffic_at_home |
| hsa-let-7b-5p    | 0.011125   | up   | 4.773517 | Vehicle_traffic_at_home |
| hsa-let-7c-5p    | 0.015205   | up   | 5.49175  | Vehicle_traffic_at_home |
| hsa-miR-100-5p   | 0.040598   | up   | 7.583029 | Vehicle_traffic_at_home |
| hsa-miR-103a-3p  | 0.039793   | up   | 7.255231 | Vehicle_traffic_at_home |
| hsa-miR-125a-5p  | 0.034176   | up   | 5.446658 | Vehicle_traffic_at_home |
| hsa-miR-125b-5p  | 0.021168   | up   | 6.086423 | Vehicle_traffic_at_home |
| hsa-miR-130a-3p  | 0.048873   | up   | 6.662414 | Vehicle_traffic_at_home |
| hsa-miR-133b     | 0.047599   | up   | 9.969255 | Vehicle_traffic_at_home |
| hsa-miR-142-3p   | 0.046327   | up   | 8.855112 | Vehicle_traffic_at_home |
| hsa-miR-146a-5p  | 0.023557   | up   | 8.37029  | Vehicle_traffic_at_home |
| hsa-miR-150-5p   | 0.039885   | up   | 10.98931 | Vehicle_traffic_at_home |
| hsa-miR-151b     | 0.015652   | up   | 8.787968 | Vehicle_traffic_at_home |
| hsa-miR-15b-5p   | 0.03082    | up   | 8.508455 | Vehicle_traffic_at_home |
| hsa-miR-16-2-3p  | 0.044513   | up   | 5.532554 | Vehicle_traffic_at_home |
| hsa-miR-185-5p   | 0.039332   | up   | 5.07439  | Vehicle_traffic_at_home |
| hsa-miR-199a-5p  | 0.04242    | up   | 4.570111 | Vehicle_traffic_at_home |
| hsa-miR-203a-3p  | 0.02749    | up   | 18.03255 | Vehicle_traffic_at_home |
| hsa-miR-204-5p   | 0.041068   | up   | 9.511877 | Vehicle_traffic_at_home |
| hsa-miR-20a-5p   | 0.045853   | up   | 8.663452 | Vehicle_traffic_at_home |
| hsa-miR-214-3p   | 0.026044   | up   | 5.304047 | Vehicle_traffic_at_home |
| hsa-miR-221-3p   | 0.017622   | up   | 8.297637 | Vehicle_traffic_at_home |
| hsa-miR-221-5p   | 0.013803   | up   | 17.72528 | Vehicle_traffic_at_home |
| hsa-miR-222-3p   | 0.013626   | up   | 3.554951 | Vehicle_traffic_at_home |
| hsa-miR-223-3p   | 0.012787   | up   | 15.80766 | Vehicle_traffic_at_home |
| hsa-miR-224-3p   | 0.017806   | up   | 9.024755 | Vehicle_traffic_at_home |
| hsa-miR-23a-3p   | 0.035768   | up   | 4.962604 | Vehicle_traffic_at_home |
| hsa-miR-23a-5p   | 0.011235   | up   | 8.435381 | Vehicle_traffic_at_home |
| hsa-miR-30c-2-3p | 0.004407   | up   | 5.743132 | Vehicle_traffic_at_home |
| hsa-miR-3188     | 0.044807   | up   | 3.079721 | Vehicle_traffic_at_home |
| hsa-miR-324-3p   | 0.035711   | up   | 2.143047 | Vehicle_traffic_at_home |
| hsa-miR-339-5p   | 0.008492   | up   | 7.478019 | Vehicle_traffic_at_home |
| hsa-miR-342-3p   | 0.018368   | up   | 6.661599 | Vehicle_traffic_at_home |
| hsa-miR-365a-3p  | 0.036355   | up   | 6.536557 | Vehicle_traffic_at_home |
| hsa-miR-4306     | 0.002998   | up   | 3.347996 | Vehicle_traffic_at_home |
| hsa-miR-4324     | 0.033328   | up   | 5.706607 | Vehicle_traffic_at_home |
| hsa-miR-4516     | 0.006668   | up   | 2.859822 | Vehicle_traffic_at_home |
| hsa-miR-452-5p   | 0.014409   | up   | 7.888119 | Vehicle_traffic_at_home |
| hsa-miR-4532     | 0.014752   | up   | 2.258895 | Vehicle_traffic_at_home |
| hsa-miR-455-3p   | 0.009444   | up   | 15.94311 | Vehicle_traffic_at_home |
| hsa-miR-4634     | 0.030527   | up   | 2.128231 | Vehicle_traffic_at_home |
| hsa-miR-4655-3p  | 0.021817   | up   | 6.810059 | Vehicle_traffic_at_home |
| hsa-miR-4731-3p  | 0.01469    | up   | 6.153936 | Vehicle_traffic_at_home |
| hsa-miR-501-5p   | 0.012      | up   | 9.779916 | Vehicle_traffic_at_home |
| hsa-miR-505-5p   | 0.013655   | up   | 7.634665 | Vehicle_traffic_at_home |
| hsa-miR-517a-3p  | 0.027523   | up   | 5.597306 | Vehicle_traffic_at_home |
| hsa-miR-517c-3p  | 0.025637   | up   | 5.422509 | Vehicle_traffic_at_home |
| hsa-miR-582-5p   | 0.044966   | up   | 13.7203  | Vehicle_traffic_at_home |
| hsa-miR-6895-5p  | 0.006121   | up   | 7.657433 | Vehicle_traffic_at_home |

|                  |          |      |          |                         |
|------------------|----------|------|----------|-------------------------|
| hsa-miR-744-5p   | 0.019918 | up   | 10.30978 | Vehicle_traffic_at_home |
| hsa-miR-98-5p    | 0.035529 | up   | 13.94902 | Vehicle_traffic_at_home |
| hsa-miR-99b-5p   | 0.040104 | up   | 4.172732 | Vehicle_traffic_at_home |
| hur_6            | -        | -    | -        | Vehicle_traffic_at_home |
| hsa-miR-133a-3p  | 0.017678 | up   | 5.314951 | km_from_etna_50_median  |
| hsa-miR-135a-5p  | 0.034151 | up   | 5.869018 | km_from_etna_50_median  |
| hsa-miR-193a-5p  | 0.044354 | up   | 2.526421 | km_from_etna_50_median  |
| hsa-miR-27a-5p   | 0.023292 | down | -3.61896 | km_from_etna_50_median  |
| hsa-miR-29b-2-5p | 0.014229 | up   | 4.74146  | km_from_etna_50_median  |
| hsa-miR-340-5p   | 0.033516 | up   | 6.845372 | km_from_etna_50_median  |
| hsa-miR-3607-3p  | 0.012756 | up   | 5.837188 | km_from_etna_50_median  |
| hsa-miR-361-3p   | 0.025633 | up   | 4.868399 | km_from_etna_50_median  |
| hsa-miR-449a     | 0.026818 | up   | 10.2289  | km_from_etna_50_median  |
| hsa-miR-4770     | 0.03923  | up   | 4.277719 | km_from_etna_50_median  |
| hsa-miR-500a-3p  | 0.037476 | up   | 4.086222 | km_from_etna_50_median  |
| hsa-miR-500b-5p  | 0.008137 | up   | 3.92188  | km_from_etna_50_median  |
| hsa-miR-505-5p   | 0.030313 | up   | 4.50934  | km_from_etna_50_median  |
| hsa-miR-5701     | 0.019156 | up   | 6.29237  | km_from_etna_50_median  |
| hsa-miR-628-5p   | 0.022147 | up   | 5.505154 | km_from_etna_50_median  |
| hsa-miR-642b-5p  | 0.016176 | up   | 2.964167 | km_from_etna_50_median  |
| hsa-miR-6516-3p  | 0.041004 | up   | 5.372472 | km_from_etna_50_median  |
| hsa-miR-652-3p   | 0.027532 | up   | 4.759585 | km_from_etna_50_median  |
| hsa-miR-664a-3p  | 0.042052 | up   | 2.812089 | km_from_etna_50_median  |
| hsa-miR-664b-3p  | 0.023029 | up   | 3.220316 | km_from_etna_50_median  |
| hsa-miR-874-5p   | 0.003118 | up   | 5.434077 | km_from_etna_50_median  |
| hsa-miR-16-2-3p  | 0.024773 | down | -9.45544 | Radon_risk_Home_type    |
| hsa-miR-182-3p   | 0.033553 | down | -7.05349 | Radon_risk_Home_type    |
| hsa-miR-22-5p    | 0.030786 | down | -15.112  | Radon_risk_Home_type    |
| hsa-miR-221-5p   | 0.016387 | down | -23.7398 | Radon_risk_Home_type    |
| hsa-miR-30c-2-3p | 0.012436 | down | -6.19418 | Radon_risk_Home_type    |
| hsa-miR-3660     | 0.001222 | down | -29.6997 | Radon_risk_Home_type    |
| hsa-miR-4306     | 0.005655 | down | -3.77123 | Radon_risk_Home_type    |
| hsa-miR-4440     | 0.033708 | down | -7.56958 | Radon_risk_Home_type    |
| hsa-miR-4443     | 0.0132   | down | -3.02148 | Radon_risk_Home_type    |
| hsa-miR-452-5p   | 0.030769 | down | -8.7803  | Radon_risk_Home_type    |
| hsa-miR-454-3p   | 0.01435  | down | -33.4518 | Radon_risk_Home_type    |
| hsa-miR-455-3p   | 0.038657 | down | -14.6433 | Radon_risk_Home_type    |
| hsa-miR-4793-3p  | 0.002683 | down | -13.7501 | Radon_risk_Home_type    |
| hsa-miR-598-3p   | 0.025903 | down | -15.7451 | Radon_risk_Home_type    |
| hsa-miR-6500-5p  | 0.035551 | down | -6.86215 | Radon_risk_Home_type    |
| hsa-miR-6826-5p  | 0.037038 | down | -2.57302 | Radon_risk_Home_type    |
| hsa-miR-6872-3p  | 0.020769 | down | -3.46987 | Radon_risk_Home_type    |
| hsa-miR-7159-5p  | 0.031503 | down | -5.91743 | Radon_risk_Home_type    |
| hsa-miR-98-5p    | 0.020851 | down | -28.8801 | Radon_risk_Home_type    |

Table S3. **Cancer Related miRNAs** altered (FC>= 2, p<=0.05) in Volcano Plot Analysis between average signal in samples of patients alive vs. dead within 3 years since biopsy.

| systematic_name | p-value | Regulation | FC |
|-----------------|---------|------------|----|
|-----------------|---------|------------|----|

|                 |             |      |       |
|-----------------|-------------|------|-------|
| hsa-miR-1227-5p | 0.03180667  | up   | 2.42  |
| hsa-miR-147b    | 0.011820709 | down | -3.96 |
| hsa-miR-187-5p  | 0.03807269  | up   | 6.18  |
| hsa-miR-23a-5p  | 0.01835003  | up   | 6.71  |
| hsa-miR-2861    | 0.036854673 | up   | 2.08  |
| hsa-miR-3663-5p | 0.03956902  | up   | 5.03  |
| hsa-miR-371b-5p | 0.001374278 | up   | 3.66  |
| hsa-miR-6068    | 0.016317874 | up   | 2.72  |
| hsa-miR-6075    | 0.02674605  | up   | 4.83  |
| hsa-miR-6771-5p | 0.023678219 | up   | 5.23  |
| hsa-miR-7704    | 0.03648895  | up   | 2.15  |
